# Supplementary material for: Expression of CYP2B6 Enzyme in Human Liver Tissue of HIV and HCV Patients
Source: MDPI journal article supplement (doi:10.3390/medicina59071207), 2023-06-27
Supplement: s1 [file s1]

# Supplement S3.Use of medications in study population

|     | Infection | ART         | HCV therapy |         | Other medications                   |
|-----|-----------|-------------|-------------|---------|-------------------------------------|
|     |           |             | PEG-IFN     | DAA     |                                     |
| 1.  | HIV       | EFV+ABC/LAM |             |         | ASP 100mg daily<br>BIS 1.25mg daily |
| 2.  | HIV       | DTG+EMT/TDF |             |         |                                     |
| 3.  | HIV       | DTG+EMT/TDF |             |         |                                     |
| 4.  | HIV       | DTG+EMT/TDF |             |         |                                     |
| 5.  | HIV       | EFV+ABC/LAM |             |         |                                     |
| 6.  | HIV       | DTG+EMT/TDF |             |         |                                     |
| 7.  | HIV       | DTG+EMT/TDF |             |         |                                     |
| 8.  | HIV       | DTG+EMT/TDF |             |         |                                     |
| 9.  | HIV       | DTG+EMT/TDF |             |         |                                     |
| 10. | HIV/HCV   | DTG+EMT/TDF | no          | no      |                                     |
| 11. | HIV/HCV   | DTG+EMT/TDF | no          | no      | SIL 420mg daily                     |
| 12. | HIV/HCV   | EFV+ABC/LAM | no          | no      |                                     |
| 13. | HIV/HCV   | EFV+ABC/LAM | no          | no      |                                     |
| 14. | HIV/HCV   | DTG+EMT/TDF | no          | no      |                                     |
| 15. | HIV/HCV   | EFV+ABC/LAM | no          | no      |                                     |
| 16. | HIV/HCV   | DTG+EMT/TDF | no          | no      |                                     |
| 17. | HIV/HCV   | DTG+EMT/TDF | no          | no      |                                     |
| 18. | HIV/HCV   | EFV+ABC/LAM | no          | no      |                                     |
| 19. | HIV/HCV   | EFV+ABC/LAM | no          | no      |                                     |
| 20. | HIV/HCV   | DTG+EMT/TDF | no          | no      |                                     |
| 21. | HIV/HCV   | DTG+EMT/TDF | no          | no      |                                     |
| 22. | HIV/HCV   | DTG+EMT/TDF | no          | no      |                                     |
| 23. | HIV/HCV   | EFV+ABC/LAM | no          | no      |                                     |
| 24. | HIV/HCV   | DTG+EMT/TDF | no          | no      | LOR 1mg daily                       |
| 25. | HCV       |             | no          | no      | SIL 420mg daily                     |
| 26. | HCV       |             | no          | no      |                                     |
| 27. | HCV       |             | no          | no      |                                     |
| 28. | HCV       |             | no          | no      |                                     |
| 29. | HCV       |             | no          | no      |                                     |
| 30. | HCV       |             | no          | no      |                                     |
| 31. | HCV       |             | no          | no      |                                     |
| 32. | HCV       |             | no          | no      |                                     |
| 33. | HCV       |             | no          | no      |                                     |
| 34. | HCV       |             | no          | no      |                                     |
| 35. | HCV       |             | no          | no      |                                     |
| 36. | HCV       |             | no          | no      |                                     |
| 37. | HCV       |             | no          | no      |                                     |
| 38. | HCV       |             | no          | no      |                                     |
| 39. | HCV       |             | no          | no      |                                     |
| 40. | HCV       |             | no          | no      |                                     |
| 41. | HCV       |             |             | SOF/VEL |                                     |
| 42. | HCV       |             |             | SOF/VEL |                                     |
| 43. | HCV       |             | PEG-IFN     |         |                                     |
| 44. | HCV       |             | PEG-IFN     |         |                                     |
| 45. | HCV       |             | PEG-IFN     |         |                                     |
| 46. | HCV       |             |             | SOF     | LOR 1mg daily                       |
| 47. | HCV       |             |             | SOF/VEL |                                     |
| 48. | HCV       |             | PEG-IFN     |         |                                     |
| 49. | HCV       |             |             | SOF     |                                     |
| 50. | HCV       |             | PEG-IFN     |         | ASA 100mg daily                     |
| 51. | HCV       |             | PEG-IFN     |         |                                     |
| 52. | HCV       |             |             | SOF/VEL |                                     |
| 53. | HCV       |             | PEG-IFN     |         | ASA 100mg daily                     |
| 54. | HCV       |             |             | SOF     |                                     |

HCV-hepatitis C virus; HIV-human immunodeficiency virus; HIV/HCV-human immunodeficiency virus patients co-infected with hepatitis C virus;

ART-antiretroviral therapy; DTG-dolutegravir; EMT-emitricabine; TDF-tenofovir disoproxil fumarate; EFV-efavirenz; ABC-abacavir; LAM-lamivudine;

PEG-IFN-pegylated interferon; DAA-direct-acting antivirals; SOF-sofobuvir; VEL- velpatasvir;

SIL-silymarin; LOR-lorazepam; ASP- acetylsalicylic acid; BIS-bisoprolol;
