# Supplementary material for: Expression of CYP2B6 Enzyme in Human Liver Tissue of HIV and HCV Patients
Source: MDPI journal article supplement (doi:10.3390/medicina59071207), 2023-06-27
Supplement: s1 [file s1]

## Supplement S2. Study population clinical data summary

| Clinical data   | HCV without therapy | HIV            | HCV/HIV        | HCV receiving therapy |                |                |
|-----------------|---------------------|----------------|----------------|-----------------------|----------------|----------------|
|                 |                     |                |                | Total                 | PEG-IFN        | DAA            |
| Age*            | 47.81 (±12.82)      | 57.22 (±18.46) | 49.20 (±10.78) | 48.5 (±8.81)          | 51.29 (±10.44) | 45.71 (±6.42)  |
| BMI*            | 23.18 (±4.09)       | 23.06 (±2.12)  | 22.61(±3.94)   | 25.16 (±2.80)         | 24.46 (±2.77)  | 25.98 (±2.84)  |
| Gender female** | 43.8% (n=7)         | 11.1% (n=1)    | 26.7% (n=4)    | 42.9% (n=6)           | 42.9% (n=3)    | 42.9% (n=3)    |
| Alcohol**       | 25% (n=4)           | 11.1% (n=1)    | 13.3% (n=2)    | 35.7% (n=5)           | 42.9% (n=3)    | 28.6% (n=2)    |
| Smoking**       | 43.8% (n=7)         | 33.3% (n=3)    | 40% (n=6)      | 42.9% (n=6)           | 42.9% (n=3)    | 42.9% (n=3)    |
| AST***          | 53 (33-62)          | 78 (56-87)     | 59 (37-78.5)   | 86 (61-118.5)         | 87 (63-107)    | 85 (41-127.5)  |
| ALT***          | 83 (40-100.75)      | 98 (85-115)    | 89 (69-113)    | 111 (98-179.5)        | 115 (98-150)   | 106 (93-183.5) |
| CRP***          | 2.5 (1.3-5.25)      | 2 (2-3)        | 3 (1-5.5)      | 2.7 (2-4)             | 2 (2-3)        | 4 (2.1-4.5)    |

\*Mean (±Standard deviation); \*\*Percentage within the group (N); \*\*\*Median (25<sup>th</sup>-75<sup>th</sup> percentile);

HCV-hepatitis C virus; HIV-human immunodeficiency virus; HIV/HCV-human immunodeficiency virus patients co-infected with hepatitis C virus;

PEG-IFN-pegylated interferon; DAA-direct-acting antivirals;

BMI – body mass index; AST-aspartate aminotransferase; ALT-alanine transaminase; CRP-C-reactive protein.
